# Supplementary material
Source: PubMed Central journal article supplement (PMC8418345)

Figure 3

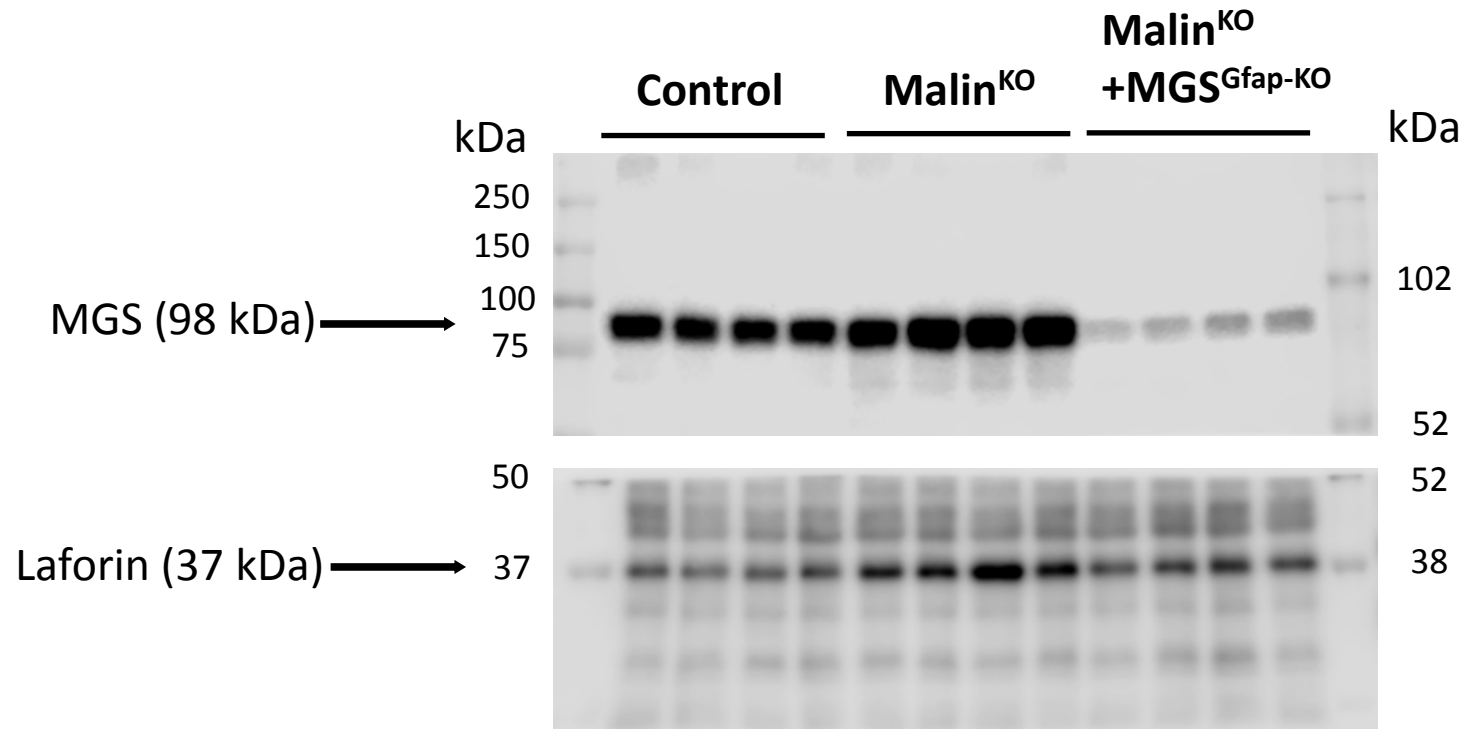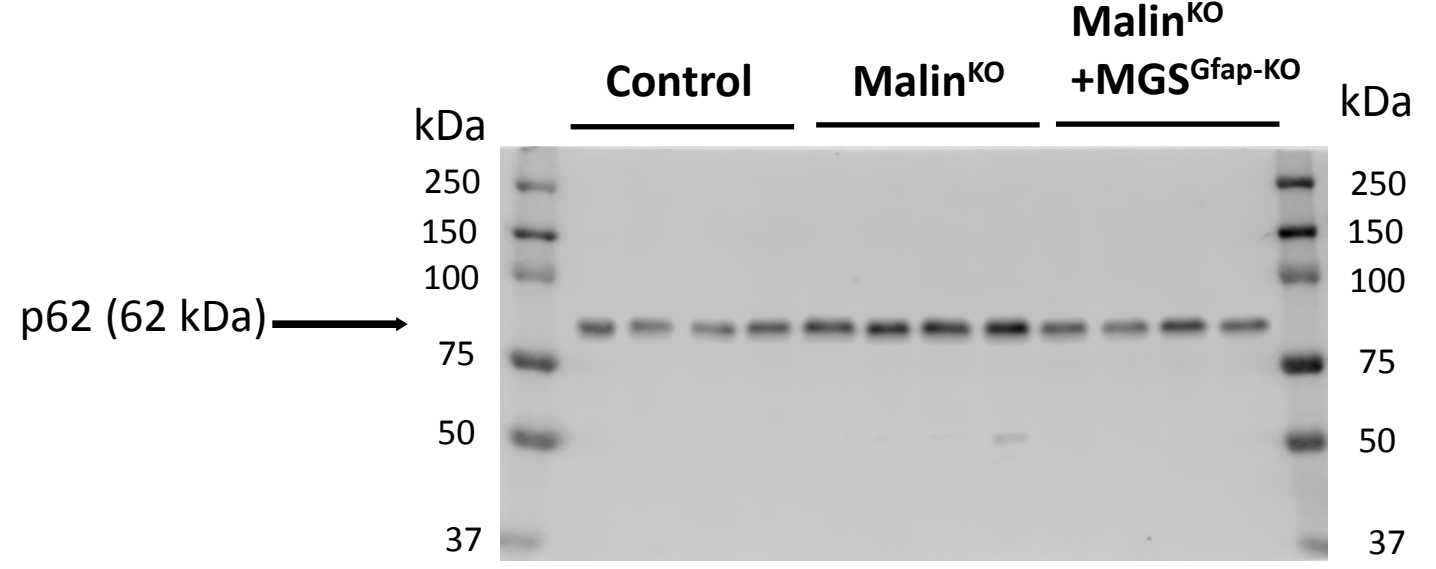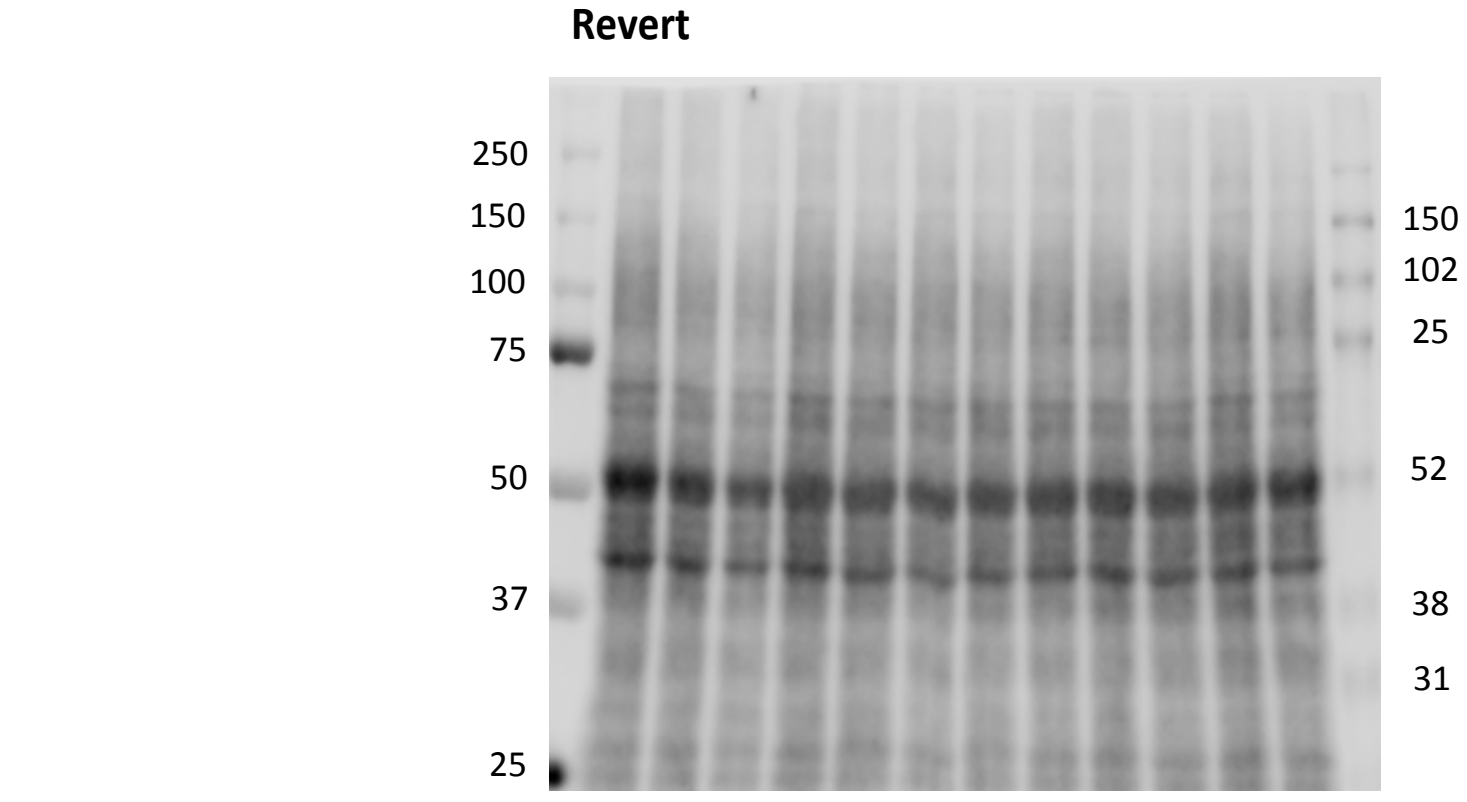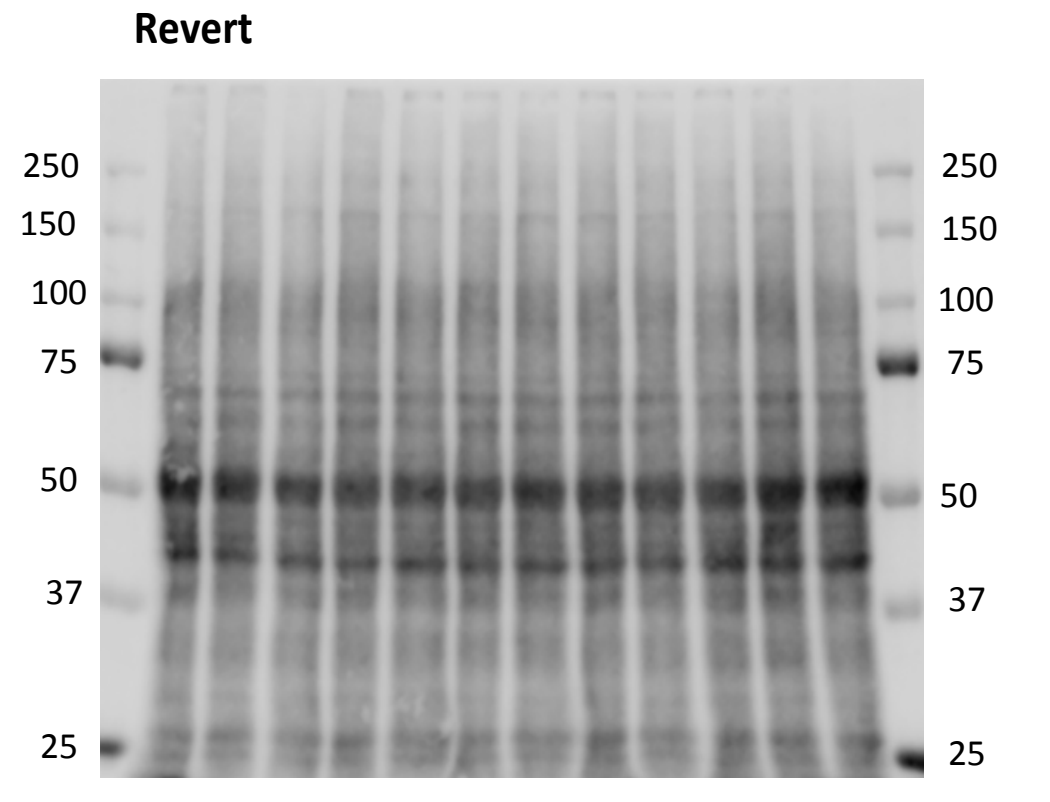

Figure 5

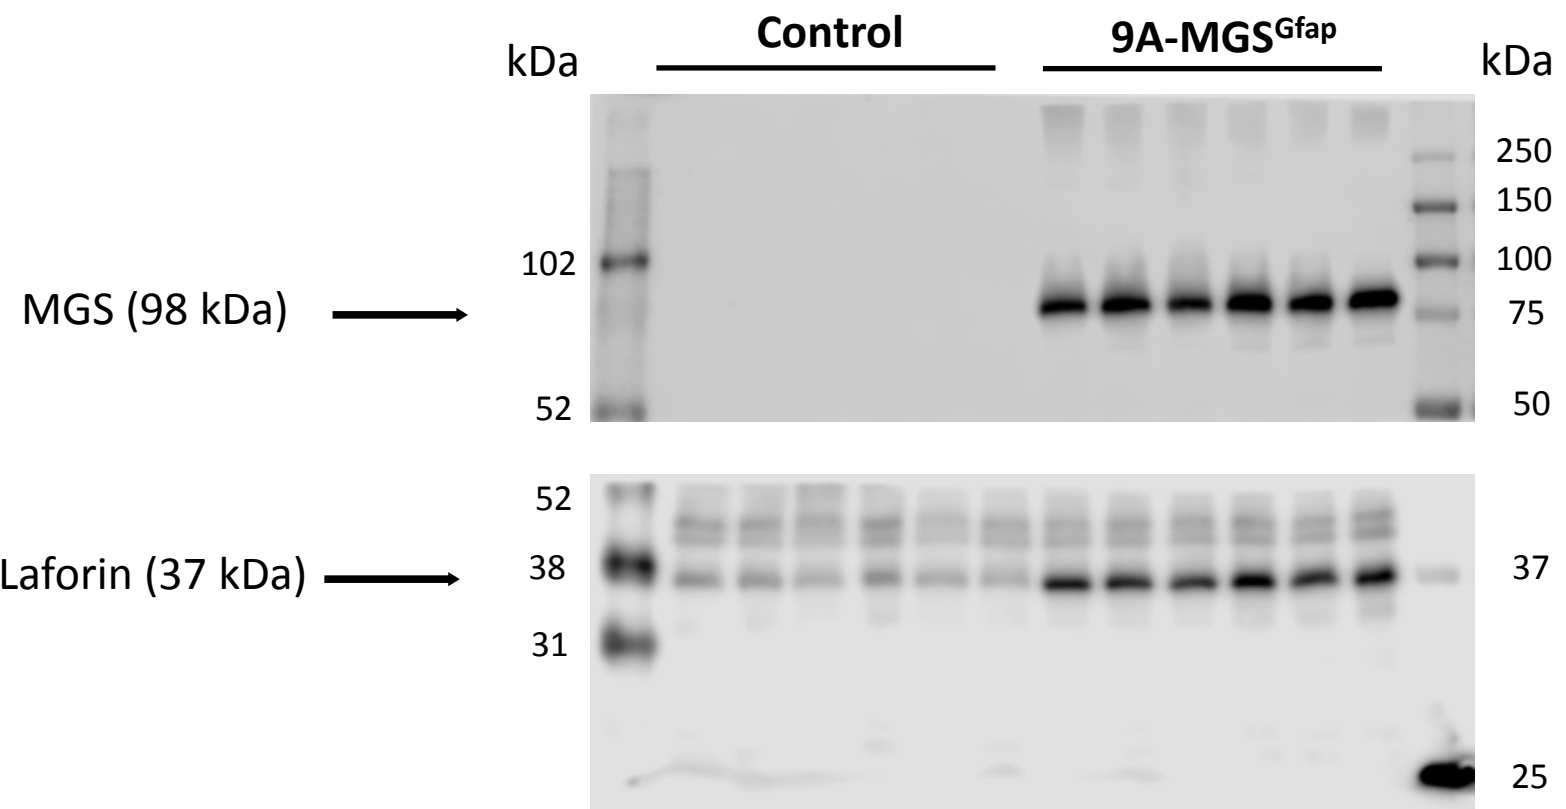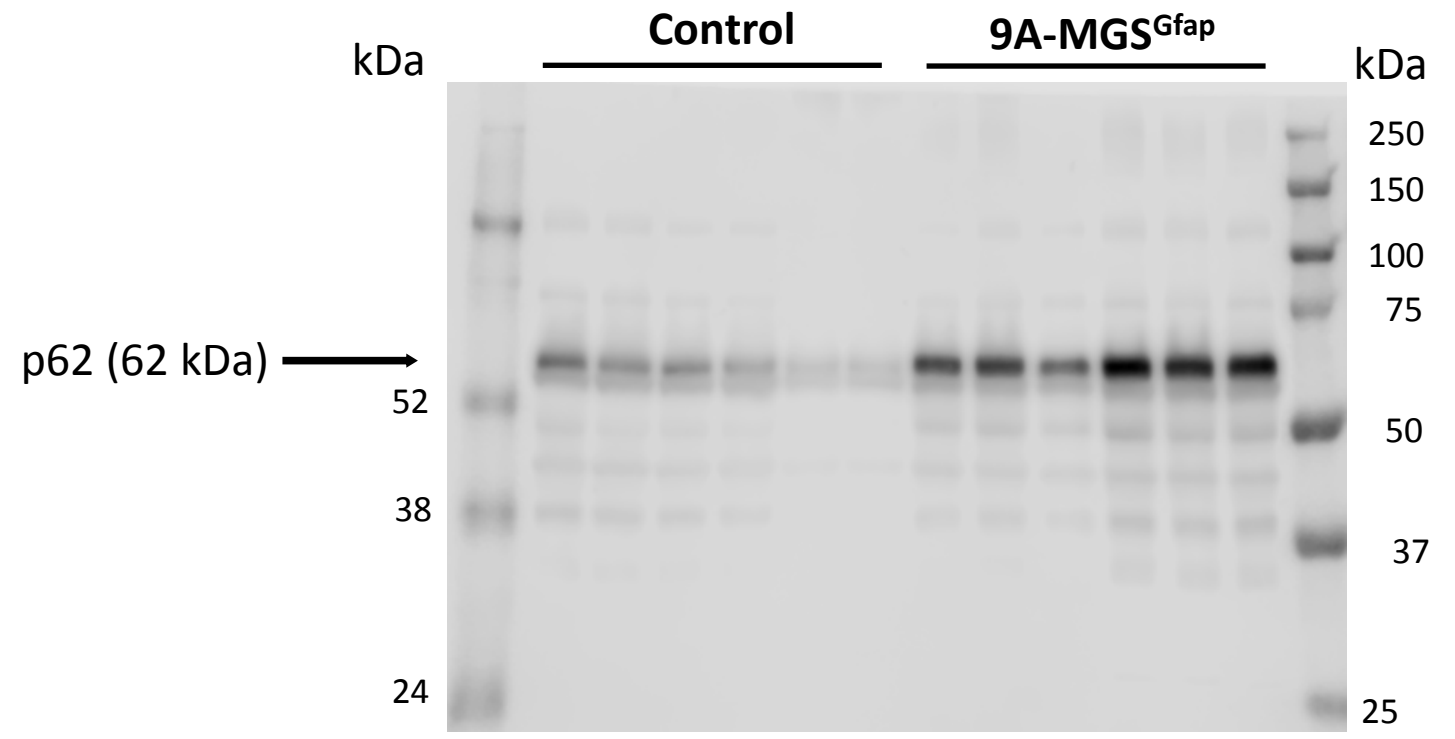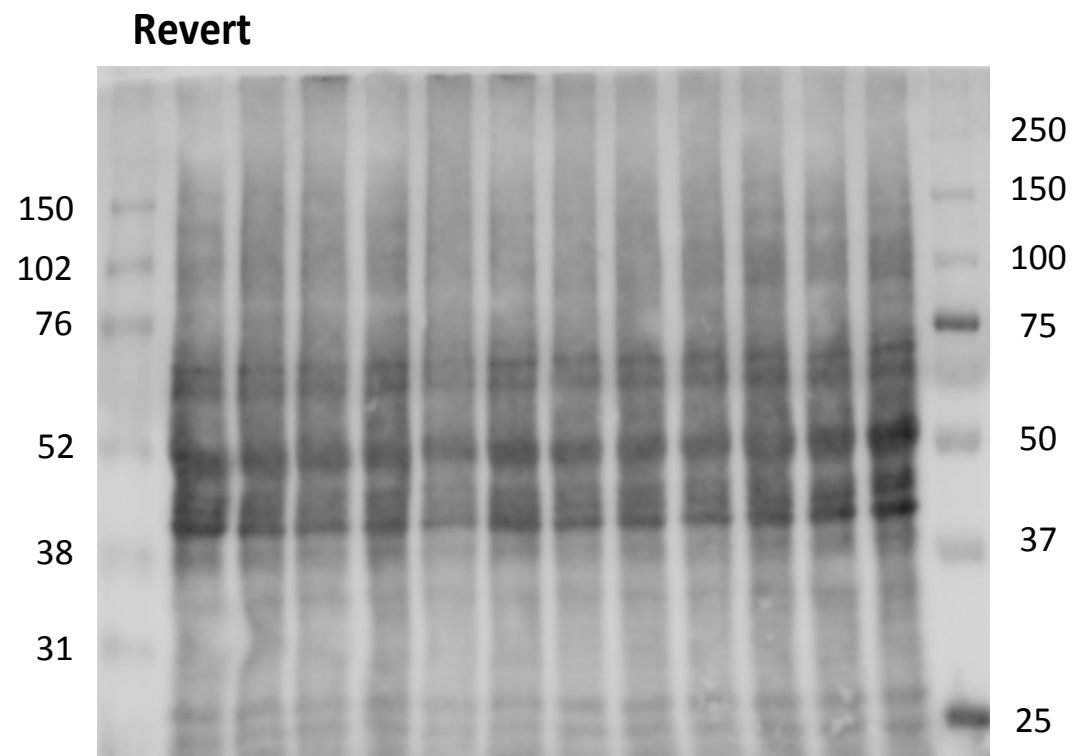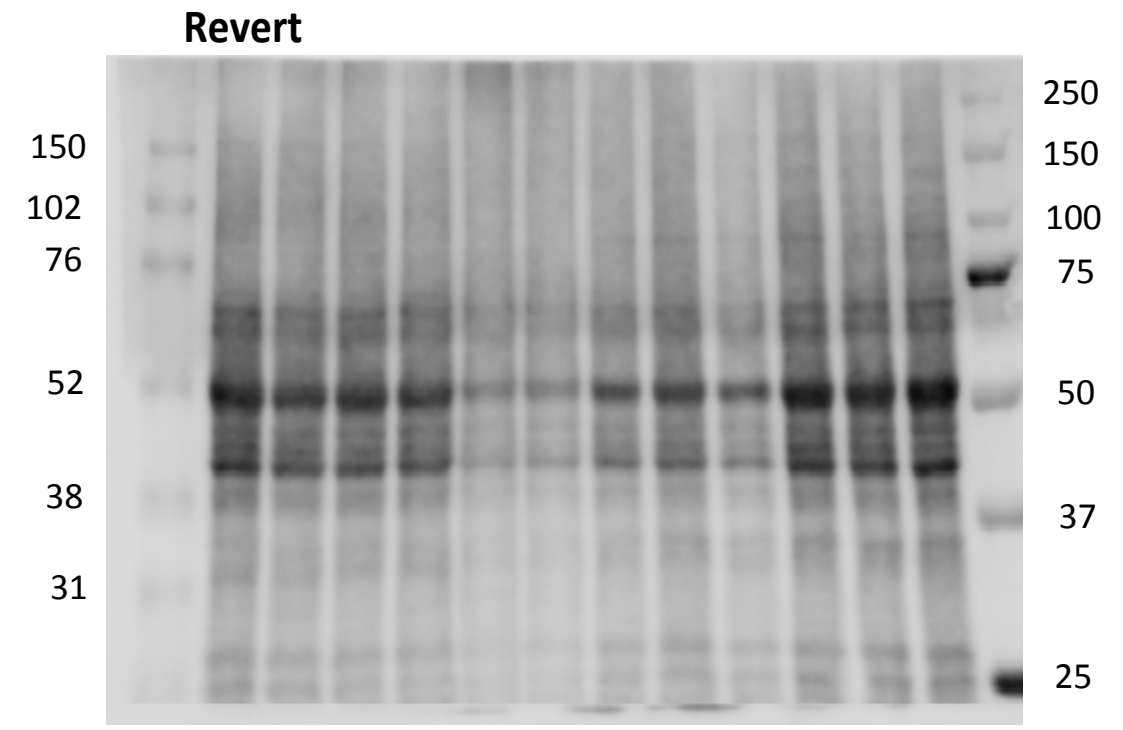

Supplementary Figure 1C

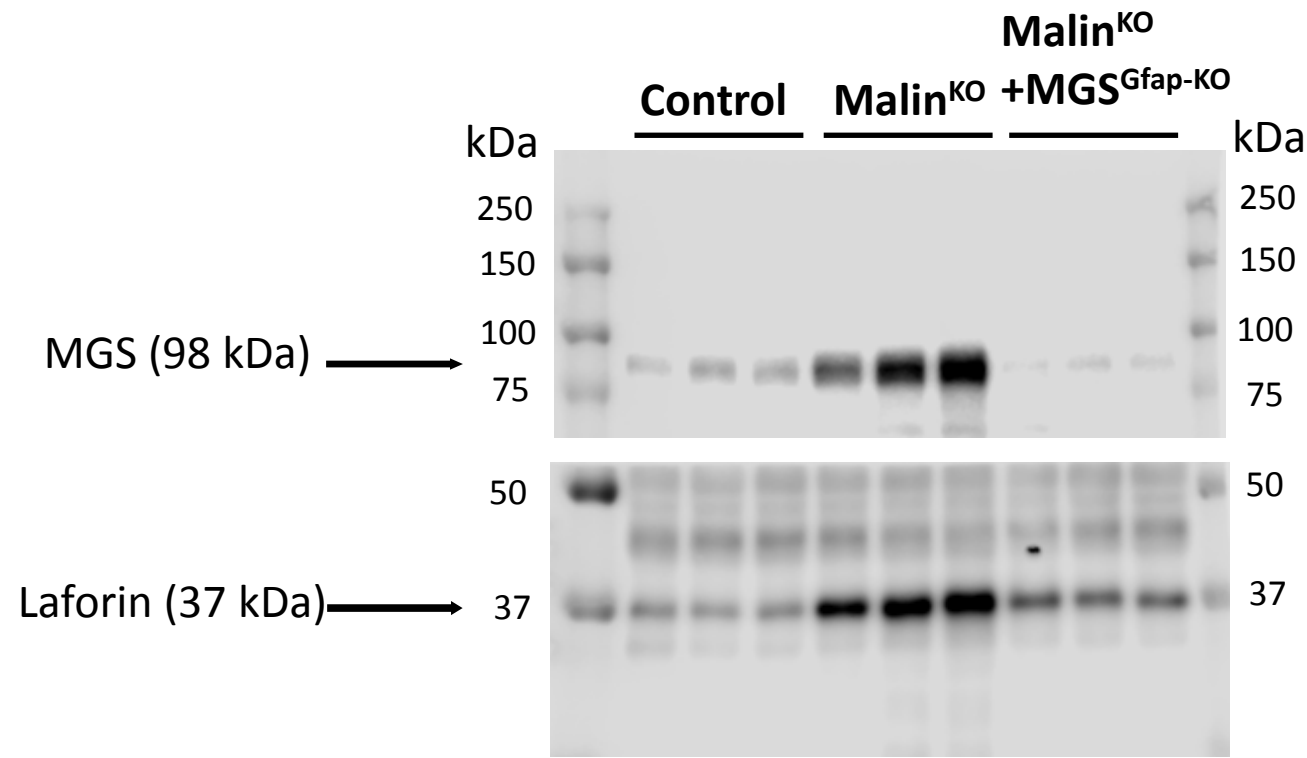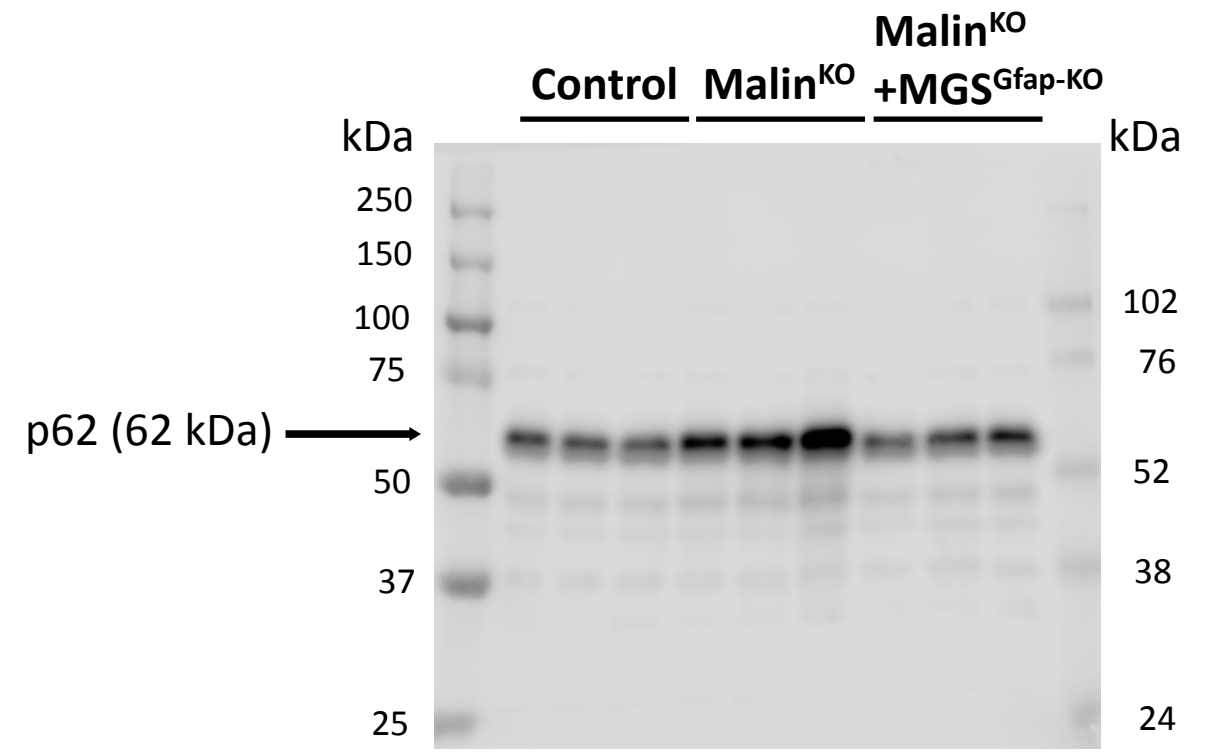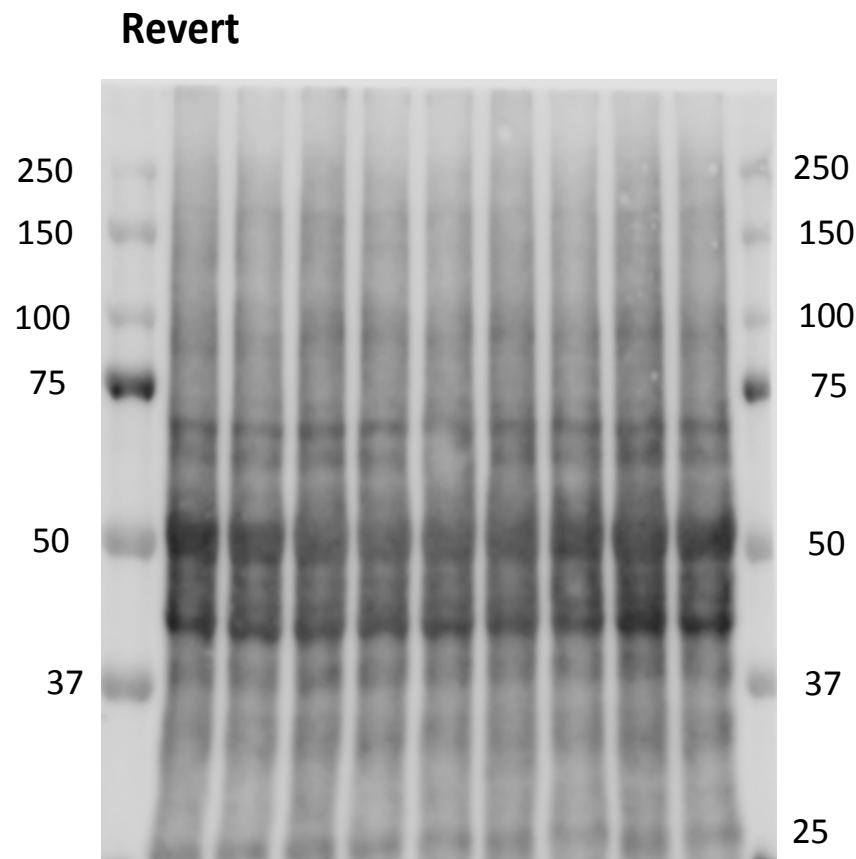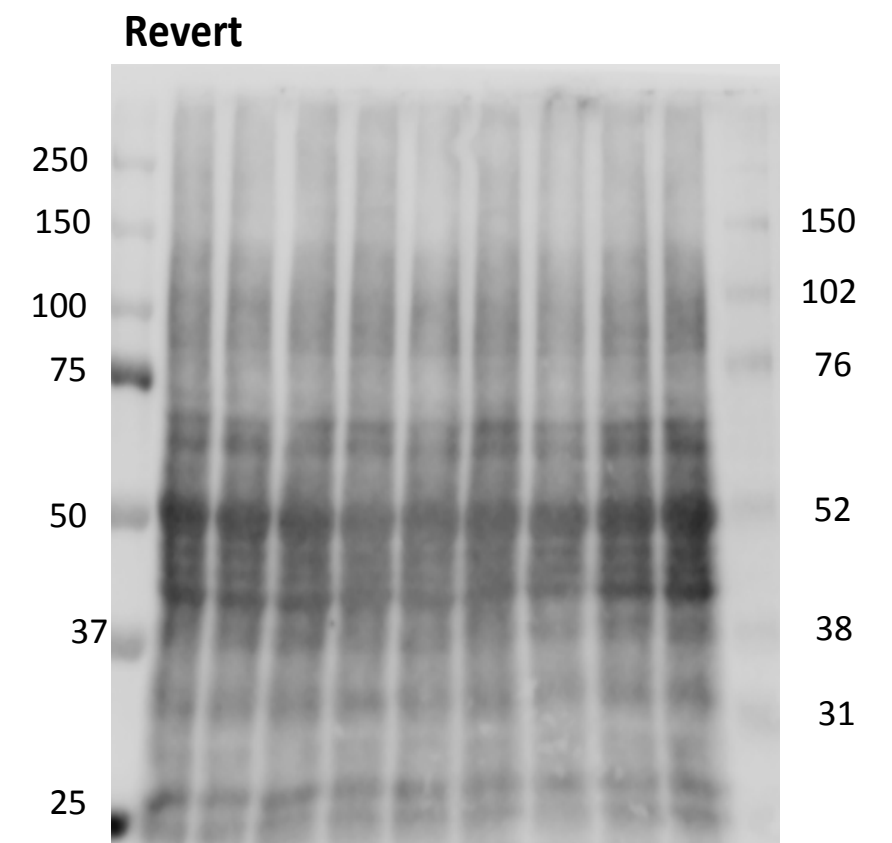

Supplement: awab110_supplementary_data.pdf [file awab110_supplementary_data.pdf]
